# Supplementary material
Source: PubMed Central journal article supplement (PMC9912170)
Supplement: jamaophthalmol-e226092-s002.pdf [file jamaophthalmol-e226092-s002.pdf]

## Data Sharing Statement

Mohammadzadeh. Association of Blood Pressure With Rates of Macular Ganglion Cell Complex Thinning in Patients With Glaucoma. *JAMA Ophthalmol*. Published February 09, 2023. doi:10.1001/jamaophthalmol.2022.6092

### Data

**Data available:** No

### Additional Information

**Explanation for why data not available:** Based on the current IRB protocol, the patient data cannot be shared with others.
